# Supplementary material
Source: Elsevier journal article supplement (https://www.sciencedirect.com/science/article/pii/S2444866416300241)
Supplement: mmc1 [file S2444866416300241:mmc1.docx]

Table S1 - Skin-prick test allergen positivity in T1.

| T1 (n=330) | |
| --- | --- |
| SPT positivity | 35,3% |
| Dermatophagoides pteronyssinus | 27,9% |
| Dermatophagoides farinae | 23,0% |
| Lepidoglyphus destructor | 18,8% |
| Dog | 5,5% |
| Cat | 7,9% |
| Horse | 2,4% |
| Phleum pratense | 10,9% |
| Dactylis glomerata | 13,6% |
| Wheat | 10,3% |
| Parietaria judaica | 3,3% |
| Artemisia vulgaris | 3,3% |
| Betula | 1,8% |
| Olea Europaea | 2,7% |
| Platanus | 1,5% |
| Cypress | 0,9% |
| Ulmus | 0,6% |
| Corylus avellana | 1,8% |
| Cladosporium herbarium | 90% |
| Aspergillus fumigatus | 2,4% |
| Alternaria alternata | 1,8% |

Table S2 - Skin-prick test allergen positivity in T2.

| T2 (n=786) | |
| --- | --- |
| SPT positivity | 31,7% |
| Dermatophagoides pteronyssinus | 20,2% |
| Grass Mix | 7,9% |
| Weed Mix | 4,3% |
| Cat | 13,6% |
| Dog | 8,0% |
| Alternaria alternata | 3,6% |
